# Supplementary material for: A pH-responsive supramolecular hydrogel encapsulating a CuMnS nanoenzyme catalyst for synergistic photothermal–photodynamic–chemodynamic therapy of tumours
Source: Royal Society of Chemistry journal article supplement (doi:10.1039/d3tb01769a), 2023-01-01
Supplement: d3tb01769a1.pdf [file d3tb01769a1.pdf]

**Electronic Supplementary Information for:**

**pH-Responsive supramolecular hydrogel  
encapsulating CuMnS nanoenzyme catalyst  
for synergistic photothermal-photodynamic-  
chemodynamic therapy of tumors**

AnQin Dong<sup>a†</sup>, Shiwei Huang<sup>b†</sup>, Zhiyi Qian<sup>b</sup>, Sicheng Xu<sup>b</sup>, Weizhong Yuan<sup>a,b\*</sup>,

Bing Wang<sup>a\*</sup>

*<sup>a</sup>Department of Vascular Surgery, The Fifth Affiliated Hospital of Zhengzhou  
University, Zhengzhou 450052, People's Republic of China. E-mail: hnxgwk@163.com*

*(B. Wang)*

*<sup>b</sup>School of Materials Science and Engineering, Tongji University, Shanghai 201804,  
People's Republic of China. E-mail: yuanwz@tongji.edu.cn (W. Yuan)*

<sup>†</sup>These authors contributed equally to this work.

### Photothermal effect of PCMS NPs

To measure the photothermal conversion effect of PCMS nanoparticles, the PCMS NPs solution (500 µg/mL) was irradiated for 5 min using an 808 nm laser (1 W/cm<sup>2</sup>). Meanwhile, the temperature changes were recorded using an infrared thermal imaging camera every 30 s. The photothermal conversion efficiency of the PCMS was calculated by the eq(1).

$$\eta = \frac{hS(T_{max} - T_{surr}) - Q_s}{I(1 - 10^{-A_{808}})}$$

eq(1)

where h was the heat transfer coefficient. S was the surface area of the container. T<sub>max</sub> was the equilibrium temperature. T<sub>surr</sub> was the ambient temperature. Q<sub>s</sub> was heat loss from light absorbed by the container, and it was calculated to be approximately equal to 0 mW. I was the laser power density. A<sub>808</sub> was the absorbance of the samples at 808 nm. Where hS can be calculated by eq(2).

$$\tau_s = \frac{m_D C_D}{hS} \quad \text{eq(2)}$$

m<sub>D</sub> and C<sub>D</sub> were the mass (1 g) and heat capacity (4.2 J·g<sup>-1</sup>·°C<sup>-1</sup>) of the solvent (water). Where τ<sub>s</sub> was the sample system time constant, calculated by eq(3) and eq(4).

$$t = -\tau_s \ln \theta \quad \text{eq(3)}$$

$$\theta = \frac{T_{surr} - T}{T_{surr} - T_{max}}$$

eq(4)

where t was the cooling time, T was the temperature at cooling time, and θ was a dimensionless dynamic temperature introduced to calculate τ<sub>s</sub> (τ<sub>s</sub> was the slope of blue line in Fig. S5).

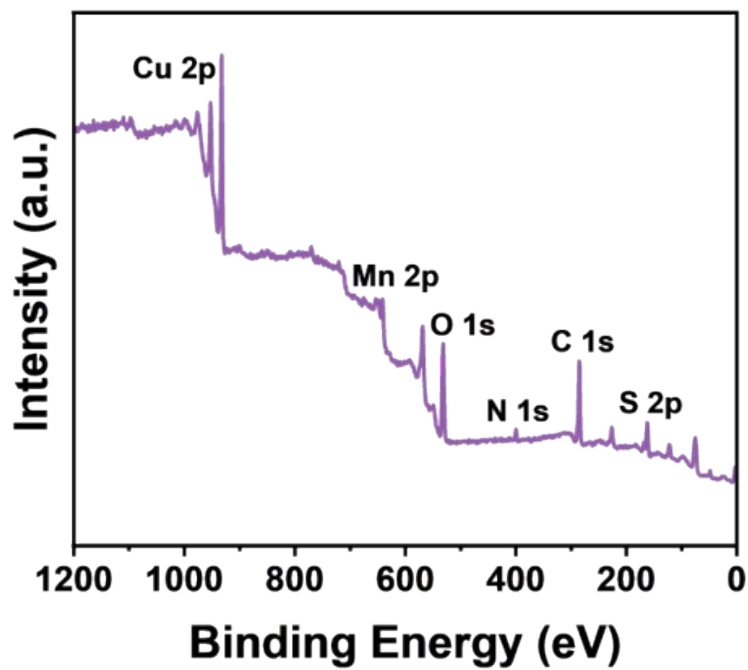

Fig. S1. XPS full spectrum patterns of PCMS NPs.

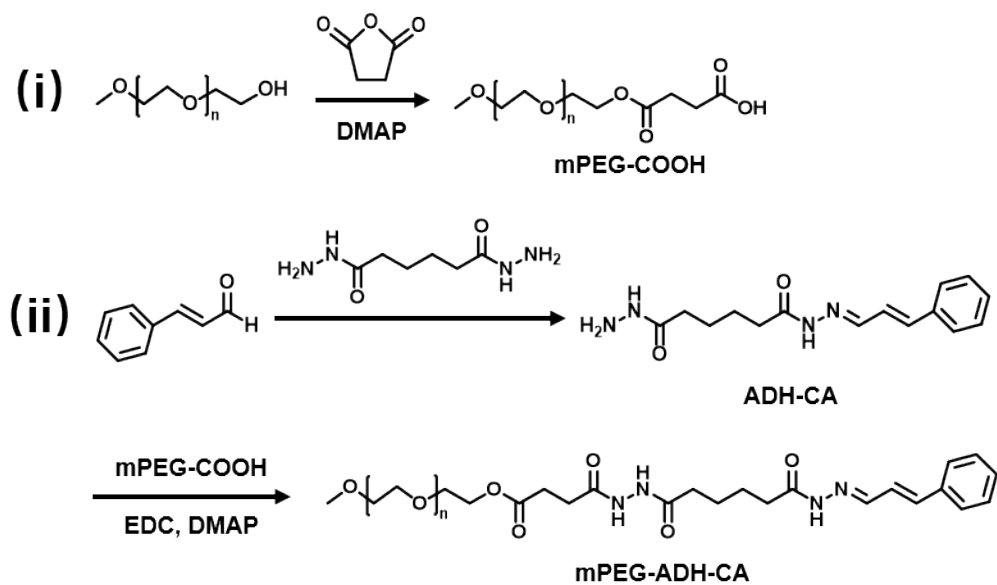

Fig. S2. Synthetic scheme for mPEG-ADH-CA.

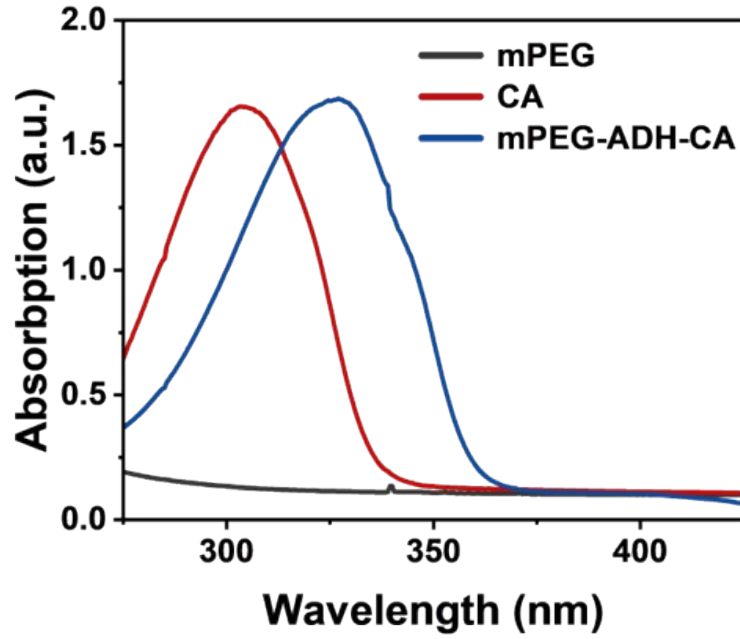

Fig. S3. UV-vis absorption spectra of mPEG, CA and mPEG-ADH-CA.

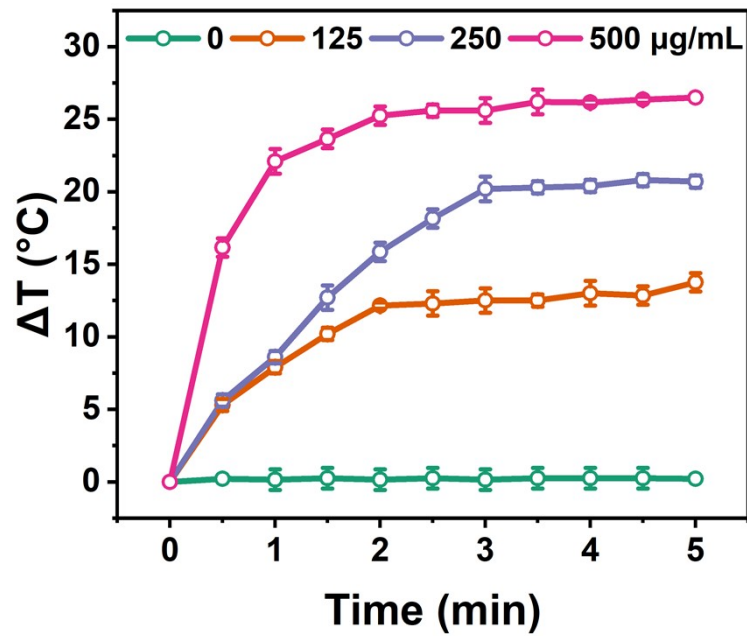

Fig. S4. Time- $\Delta T$  curves of aqueous solutions of PCMS NPs (125, 250, 500  $\mu\text{g/mL}$ ) with different concentrations under NIR (808 nm, 1  $\text{W/cm}^2$ ) irradiation.

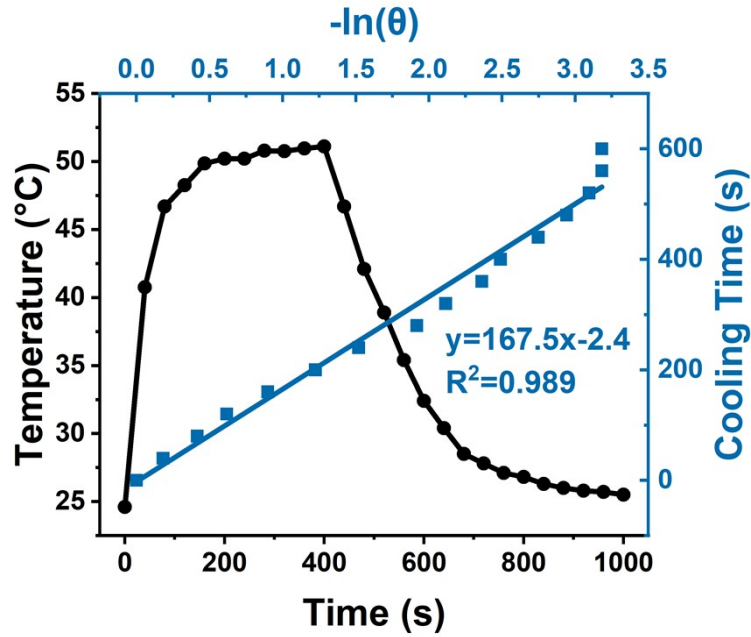

Fig. S5. Calculation of the photothermal conversion efficiency.

**Table S1.** Photothermal performance of recently reported photothermal agents

| Photothermal agents                                  | C                    | Laser (nm) | Laser power (W/cm <sup>2</sup> ) | $\Delta T$ (°C) | $\eta$ (%) |
|------------------------------------------------------|----------------------|------------|----------------------------------|-----------------|------------|
| PCMS NPs                                             | 500 $\mu\text{g/ml}$ | 808        | 1                                | 26.5            | 67.8       |
| CuCoS NPs <sup>[1]</sup>                             | 100 $\mu\text{g/ml}$ | 808        | 1                                | 40.3            | 29.4       |
| Black phosphorus quantum dots (BPQDs) <sup>[2]</sup> | 50 ppm               | 808        | 1                                | 31.5            | 28.4       |
| Au@MOF <sup>[3]</sup>                                | 50 ppm               | 808        | 0.8                              | 35.1            | 30.2       |
|                                                      |                      | 1064       |                                  | 43.5            | 48.5       |
| MoSe <sub>2</sub> nanosheets <sup>[4]</sup>          | 100 $\mu\text{g/ml}$ | 808        | 2.5                              | 29.3            | 57.9       |
| CMC-rGO/CHO-PEG hydrogel <sup>[5]</sup>              | -                    | 808        | 1                                | 39              | 86.7       |
| MSN-SS-PDA <sup>[6]</sup>                            | 200 $\mu\text{g/ml}$ | 808        | 2                                | 50.4            | 40.21      |

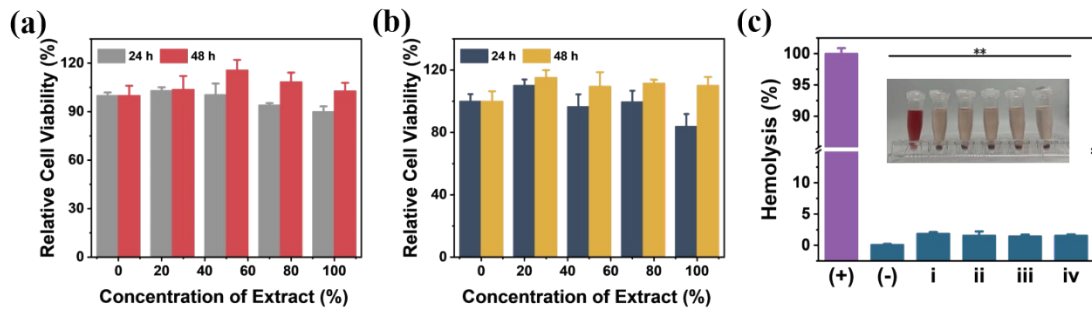

**Fig. S6.** Relative cell viability of NIH 3T3 cells after incubation with different extracts of (a) PAC/ $\alpha$ -CD hydrogel, and (b) PCMS@PAC/ $\alpha$ -CD composite hydrogel for 24 h and 48 h. (c) Hemolytic activity evaluation of different solutions and hydrogels and the digital photos of the hemolysis test (n = 3, mean  $\pm$  SD, \*\*p < 0.01).

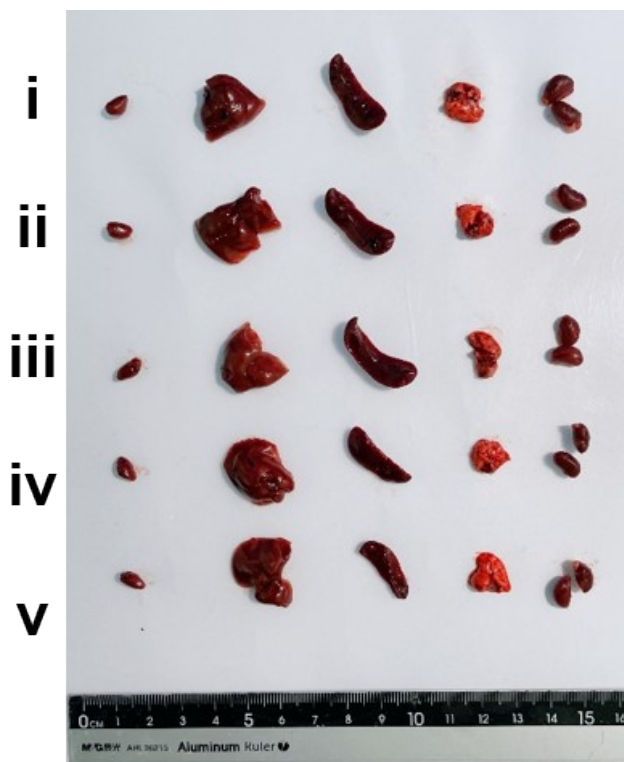

**Fig. S7.** Digital photos of tumors and major organs of mice under different treatments (i-v: Control, Gel, PCMS+PAC+NIR, Gel@PCMS, Gel@PCMS+NIR).

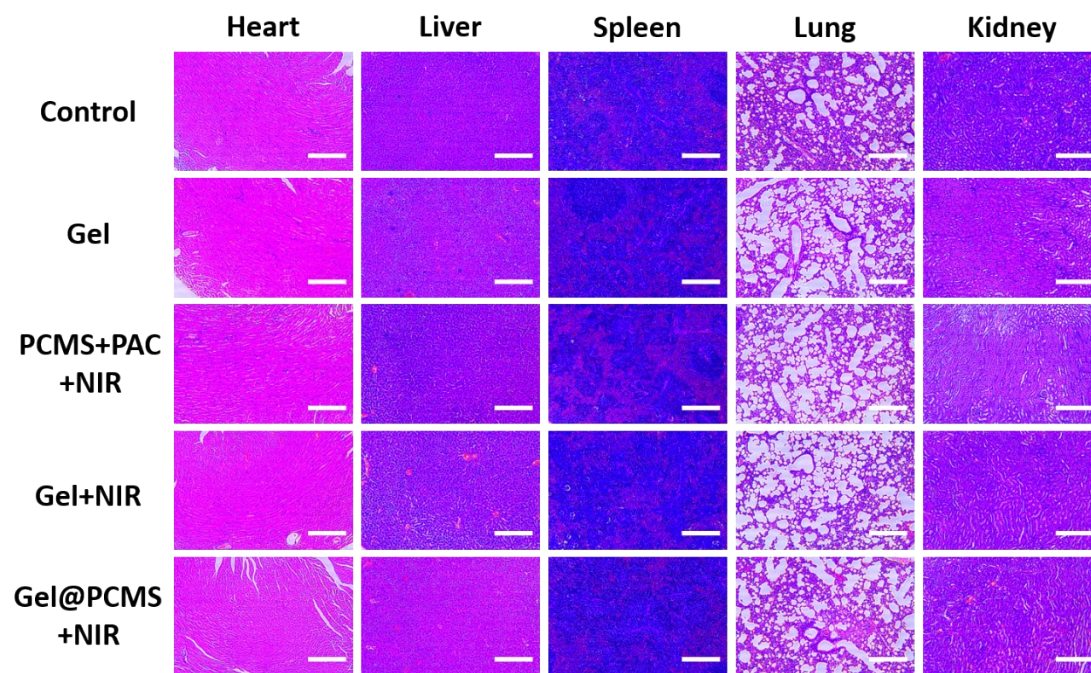

**Fig. S8.** H&E analysis of the major organs of mice under different treatments (scale bar: 200  $\mu$ m).

## References

- [1] G. Zhu, P. Zheng, M. Wang, W. Chen and C. Li, *Inorg. Chem. Front.* 2022, **9**, 1006-1015.
- [2] Z. Sun, H. Xie, S. Tang, X. F. Yu, Z. Guo, J. Shao, H. Zhang, H. Huang, H. Wang and P. K. Chu, *Angew. Chem. Int. Ed.* 2015, **54**, 11526-11530.
- [3] X. Deng, S. Liang, X. Cai, S. Huang, Z. Cheng, Y. Shi, M. Pang, P. Ma and J. Lin, *Nano Lett.* 2019, **19**, 6772-6780.
- [4] Z. Lei, W. Zhu, S. Xu, J. Ding, J. Wan and P. Wu, *ACS Appl. Mater. Interfaces* **2016**, **8**, 20900-20908.
- [5] W. Liu, X. Zhang, L. Zhou, L. Shang and Z. Su, *J. Colloid Interface Sci.* 2019, **536**, 160-170.
- [6] W. Lei, C. Sun, T. Jiang, Y. Gao, Y. Yang, Q. Zhao and S. Wang, *Mater. Sci. Eng. C Mater. Biol. Appl.* 2019, **105**, 110103.
